# Supplementary material
Source: publisher site journal article supplement (https://www.dovepress.com/article/318564)
Supplement: Supplementary file 1 [file get_supplementary_file.php]

**Appendix 1**

1. In clinical practice, do you see or treat patients who chronically use one of the following molecules?
   - Buprenorphine (or buprenorphine-containing formulations)
   - Codeine/paracetamol (or other codeine-containing formulations)
   - Fentanyl
   - Hydromorphone
   - Levomethadone
   - Methadone
   - Morphine
   - Oxycodone (or oxycodone-containing formulations)
   - Tapentadol
   - Tramadol (or tramadol-containing formulations)

*Yes/No*

1. In clinical practice, which of the following molecules are used chronically by your patients (multiple responses permitted)?
   1. Buprenorphine (or buprenorphine-containing formulations)
   2. Codeine/paracetamol (or other codeine-containing formulations)
   3. Fentanyl
   4. Hydromorphone
   5. Levomethadone
   6. Methadone
   7. Morphine
   8. Oxycodone (or oxycodone-containing formulations)
   9. Tapentadol
   10. Tramadol (or tramadol-containing formulations)
2. What type of patients do you see in clinical practice who take chronic opioids?
3. Oncology patients
4. Non-oncology patients (rehabilitative orthopedic setting, internal medicine, patients with chronic pain, primary care)
5. Patients in opioid substitution therapy for opioid dependence
6. None of the above categories

Survey questions

1. In your clinical practice do you regularly evaluate pain?
   1. Yes, I ask if the patient is experiencing pain
   2. Yes, I use an appropriate scale
   3. No, I leave the assessment and treatment of pain to a pain specialist
   4. No, I leave the assessment to the nurse
   5. I am frequently unable to evaluate pain because of cognitive deficits or problems communicating with the patient
   6. Other
2. At the center where you practice medicine, is intestinal function evaluated regularly?
3. At every visit
4. At regular intervals
5. Occasionally
6. Only if the patient/caregiver reports a GI disturbance
7. Never
8. In patients who chronically use opioids, do you systematically evaluate intestinal function?
9. Yes, I use specific scales or questionnaires to evaluate constipation
10. No, given the delicate nature of the subject I let the patient/caregiver bring it up
11. Yes, I routinely ask the patient/caregiver if the patient defecates regularly
12. No, the patient’s personal nurse is responsible for this aspect of care
13. No, other specialists are responsible for this aspect of care
14. No, our patients are accustomed to these symptoms and there are other priorities for their care
15. No, constipation is a symptom that tends to resolve spontaneously with time
16. Other (specify)
17. What criteria do you use for constipation assessment (multiple responses allowed)?
18. I use the Bristol Stool Card
19. I use the Bowel Function Index
20. I use the Rome IV criteria
21. I ask the patient/caregiver to use a diary (noting changes in bowel movement frequency, consistency of feces, use of laxatives before and after the prescription of opioid therapy)
22. None
23. Other (specify)
24. In clinical practice, in a patient receiving treatment with an opioid agonist, information about the possible emergence of constipation symptoms and indications for its prevention/management:
25. Are always provided before the initiation of treatment with an opioid
26. Are provided to patients via informative brochure
27. Are provided on patient request, at the initial onset of alterations in GI function
28. Are only provided in the case of serious constipation symptoms so as to avoid alarming the patient needlessly
29. Are provided by other healthcare practitioners (general practitioner, pain therapist, oncologist, geriatric specialist, orthopedic, rehabilitative specialist, gastroenterologist)
30. Other
31. How many cases of opioid-induced constipation do you see in your clinical practice?
32. None
33. Less than 5 per month
34. More than 5 per month
35. More than 20 per month
36. For the prevention of opioid-induced constipation, what strategies do you use in clinical practice (multiple responses allowed)?
37. Diet
38. Hydration
39. Physical exercise
40. Lifestyle advice
41. Patient self-medication
42. Laxatives
43. Reevaluation of pharmacological itneractions in patients receiving polypharmacotherapy
44. Other than dietary and lifestyle measures, what first-line therapy do you find to be useful for the management of opioid-induced constipation?
45. Evacuating enemas, glycerin
46. Senna or bisacodyl
47. Prucalopride
48. Macrogol for prophylaxis followed by a combination of macrogol and a stimulant laxative (senna or bisacodyl)
49. Other
50. In patients receiving laxative treatment for opioid-induced constipation, in what percentage do you prescribe a PAMORA (peripherally acting mu opioid receptor antagonist)?
51. Never
52. Less than 10% of cases
53. More than 10% and less than 30% of cases
54. From 30% to 50% of cases
55. More than 50%
56. In your opinion, to what degree can opioid-induce constipation influence the quality of life of your patients?
    1. Not at all
    2. To a limited degree
    3. Significantly
    4. Very significantly
57. Do you agree that opioid-induced constipation can negatively influence adherence to analgesic therapy or opioid substitution therapy?
    1. Yes, very much
    2. To some degree
    3. Depends on the patient
    4. Generally no
    5. My patients have different treatment priorities and do not normally complain about constipation
    6. Other
58. If you answered “yes” to question 14, please indicate the type of modifications that were applied to ongoing analgesic therapy.
    1. Reduction in opioid dose
    2. Switch to a weak opioid
    3. Addition of a coadjuvant and reduction of opioid dose
    4. No alterations applied to ongoing therapy
59. In your experience, what percentage of cases of opioid-induced constipation require modification of an opioid-containing therapeutic regimen for chronic pain or the dose of methadone or buprenorphine in patients receiving substitution therapy for opioid dependence?
    1. Never
    2. <10%
    3. 10-20%
    4. Other
60. In clinical practice, do you find it useful to distinguish between opioid-induced constipation and constipation exacerbated by opioid use?
    1. Always
    2. Never
    3. Only for choice of treatment
    4. Only when prescribing a PAMORA
61. Express your interest in the topic of opioid induce-constipation on a scale from 0 (no interest) to 10 (maximum interest).

*0-10*

1. Do you feel adequately educated about the treatment of opioid-induced constipation?
2. Yes
3. No, but I am interested in further education
4. No, I am not interested in the topic
5. In the management of candidates for surgical intervention, do you ask about pain symptoms and in particular if the patient has taken or is currently taking an opioid?

*Yes/No*

1. In the postoperative management of patients, do you systematically evaluate intestinal function?
   1. Yes, I routinely ask patients if they defecate regularly
   2. No, this aspect of care is the responsibility of the nursing staff
   3. Yes, an appropriate questionnaire is administered to evaluate intestinal function
   4. I don’t see these patients
   5. Other
2. What percentage of patients in your care continue to require an opioid analgesic after prosthetic surgical intervention through rehabilitation?
   1. Less than 10%
   2. Up to 30%
   3. Between 30% and 50%
   4. More than 50%
   5. I don’t know
   6. I don’t see these patients
3. In postoperative rehabilitation, are patients who use opioids correctly informed about the possible emergence of constipation symptoms and indications for its management?
   1. Yes
   2. No
   3. I don’t know
   4. I don’t see these patients
4. Do you believe that it would be useful to initiate awareness campaigns for opioid-induced constipation among patients receiving opioid therapy?

*Yes/No*

1. Do you evaluate exacerbating factors for constipation?
   *Yes/No*
2. If you answered “yes” to question 25, which of the following factors do you evaluate?
   1. Pain on defecation
   2. Neurological problems
   3. Comorbidities
   4. Currently assumed medications
   5. Other
